# Supplementary material for: Synergistic anti-friction performance and lubricating film mechanism of erucamide and N -phenyl-α-naphthylamine in polyurea grease at elevated temperatures
Source: Royal Society of Chemistry journal article supplement (doi:10.1039/d5ra06889d), 2025-01-01
Supplement: d5ra06889d1.pdf [file d5ra06889d1.pdf]

# Synergistic Anti-Friction Performance and Lubricating Film Mechanism of Erucamide and N-Phenyl- $\alpha$ -Naphthylamine in Polyurea Grease at Elevated Temperatures

Qingchun Liu <sup>a</sup>, Wuxin Yu <sup>a\*</sup>, Yimin Mo <sup>b</sup>, Jun Wang<sup>c</sup>, Changye Liu<sup>c</sup>, Ye Hong <sup>a</sup>,  
Qiang Zhang <sup>a</sup>, Fengjie Chen <sup>d</sup>

<sup>a</sup> School of Intelligent Manufacturing, Jiangnan University, Wuhan, 430056, China

<sup>b</sup> School of Mechanical and Electrical Engineering, Wuhan University of Technology,  
Wuhan, 430070, China

<sup>c</sup> SAIC-GM-Wuling Automobile Corporation., Liuzhou 454007, China

**\*Corresponding author:** Wuxin Yu; E-mail: [feedback-ssm@jhun.edu.cn](mailto:feedback-ssm@jhun.edu.cn).

**Lubricating film thicknesses calculation.** Based on the experimental conditions—including temperature, reciprocating frequency, applied load, and the rheological properties of the grease—an elastohydrodynamic lubrication (EHL) calculation model was established <sup>S1, S2, S3, S4</sup>. The lubricating film thicknesses of the grease with and without ER and N-PAN additives were obtained through theoretical calculations, as shown in Fig. S1.

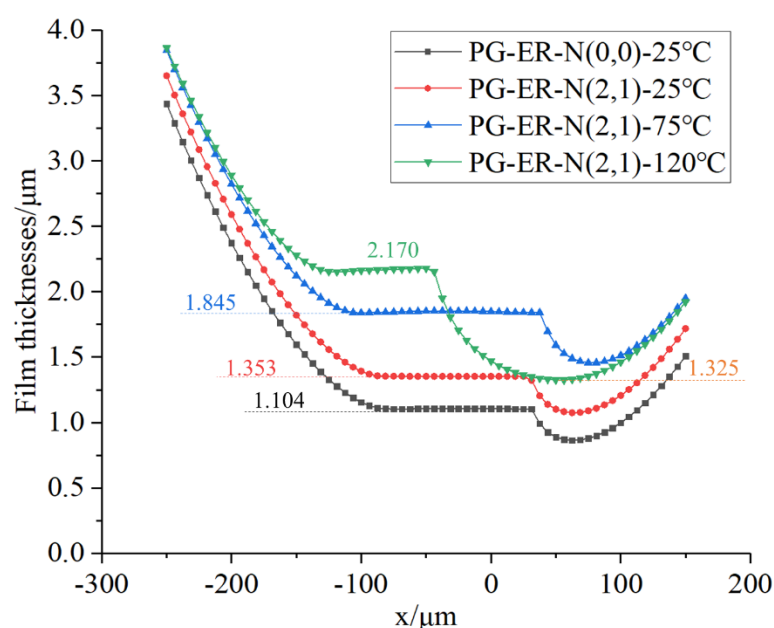

Fig. S1. Calculated results of lubricating film thicknesses

As shown in Fig. S1, the addition of 2 wt% ER and 1 wt% N-PAN enhances the film thickness compared with the base grease.

**TGA of DSC test.** The tests were conducted in an air atmosphere from room temperature to 125 °C at a heating rate of 5 °C min<sup>-1</sup>, as shown in Fig. S2.

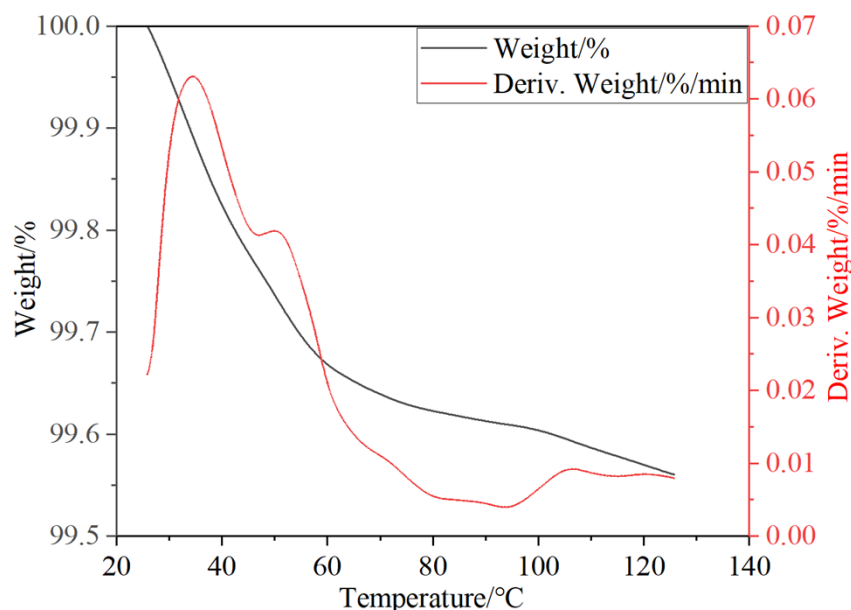

Fig. S2 Thermogravimetric analysis (TGA) curve of the PG-ER-N(2,1) grease

As presented in Fig. S2, a noticeable mass loss of the PG-ER-N(2,1) sample occurs below 34.49 °C, which is primarily attributed to the evaporation of moisture in the grease. The mass loss then stabilizes, with a total weight reduction of approximately 0.44% throughout the temperature range of room temperature to 125 °C. This result indicates that the grease exhibits excellent thermal stability without any significant decomposition or oxidation reactions within this temperature range.

**Oxidation stability test of N-PAN.** To verify the oxidation inhibition effect of N-PAN on the lubricant, the oxidation stability of the PAO base oil and PAO oils containing N-PAN was evaluated using a Rotating Oxygen Bomb apparatus, following the Chinese National Standard SH/T0193-92 “Lubricating oils—Determination of oxidation stability (Rotating bomb method)”. The tested samples included pure PAO base oil and PAO base oils containing 1 wt%, 2 wt%, and 3 wt% N-PAN. Each measurement was repeated three times, and the average value was recorded. The oxidation stability test

results of N-PAN are presented in the Supporting Information (Table S1)

Table S1. Oxidation stability test results of N-PAN

| Sample                         | PAO base oil | PAO base oil      | PAO base oil      | PAO base oil      |
|--------------------------------|--------------|-------------------|-------------------|-------------------|
|                                |              | + 1 wt% N-<br>PAN | + 2 wt% N-<br>PAN | + 3 wt% N-<br>PAN |
| Average oxidation<br>time /min | 86           | 540               | 634               | 701               |

As shown in Table S1, the oxidation induction times of the samples containing 1 wt%, 2 wt%, and 3 wt% N-PAN increased by approximately 6.27, 7.37, and 8.15 times, respectively, compared with that of the pure PAO base oil. This demonstrates that the addition of N-PAN significantly prolongs the oxidation induction time and enhances the oxidation stability of the lubricant. (It should be noted that the sample containing 3 wt% N-PAN was not selected for further investigation, as excessive N-PAN content may lead to the formation of precipitates after oxidation, which is unfavorable for friction reduction.)

### Friction coefficient.

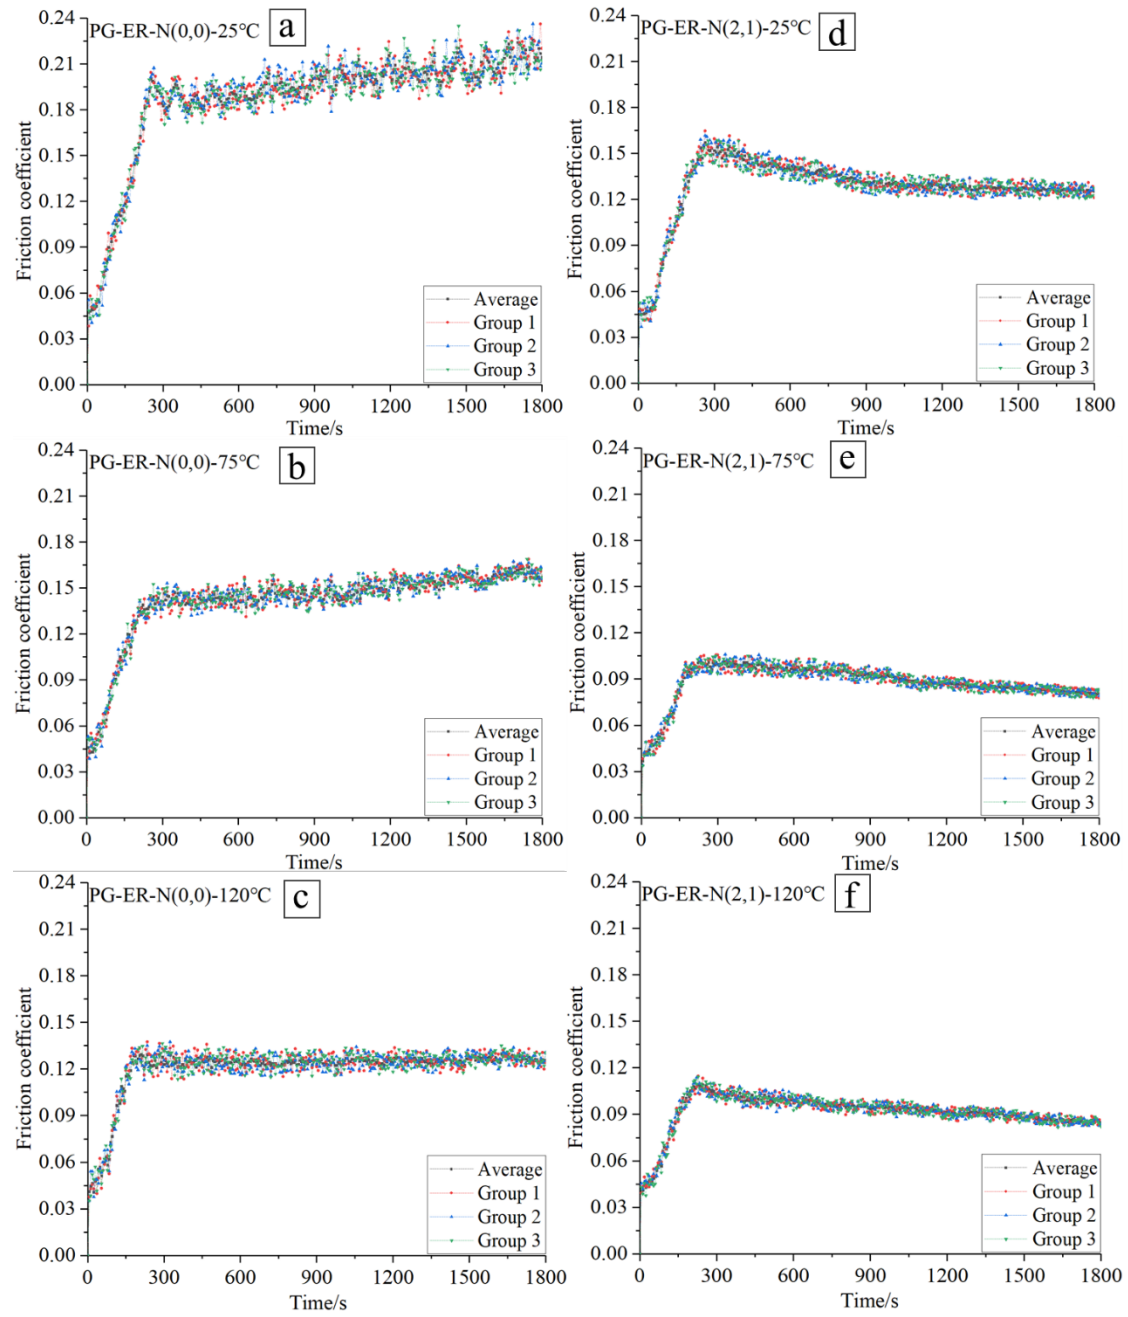

Fig. S3. Friction coefficients of PG-ER-N series greases at different temperatures for three repeated tests

Table S2. Average friction coefficients of PG-ER-N series greases at different temperatures for three repeated tests

| Sample  | PG-ER-N(0,0)-<br>25°C | PG-ER-N(0,0)-<br>75°C | PG-ER-N(0,0)-<br>120°C | PG-ER-N(2,1)-<br>25°C | PG-ER-N(2,1)-<br>75°C | PG-ER-N(2,1)-<br>120°C |
|---------|-----------------------|-----------------------|------------------------|-----------------------|-----------------------|------------------------|
| Group1  | 0.1842                | 0.1450                | 0.1238                 | 0.1292                | 0.0855                | 0.0904                 |
| Group2  | 0.1899                | 0.1417                | 0.1204                 | 0.1244                | 0.0898                | 0.0915                 |
| Group3  | 0.1869                | 0.1400                | 0.1193                 | 0.1279                | 0.0879                | 0.0946                 |
| Average | 0.187                 | 0.142                 | 0.121                  | 0.127                 | 0.088                 | 0.92                   |

**Wear rate analysis.** Based on the cross-sectional profiles of the wear scars shown in Fig. 7, the cross-sectional area was obtained by integrating the contour curves. Combined with the reciprocating stroke of 8 mm and a test duration of 30 min, the wear rate was calculated, as shown in Table S3.

Table S3. Average wear rates of PG-ER-N series greases at different temperatures for three repeated tests

| Sample                                       | PG-ER-N(0,0)-<br>25°C | PG-ER-N(0,0)-<br>75°C | PG-ER-N(0,0)-<br>120°C | PG-ER-N(2,1)-<br>25°C | PG-ER-N(2,1)-<br>75°C | PG-ER-N(2,1)-<br>120°C |
|----------------------------------------------|-----------------------|-----------------------|------------------------|-----------------------|-----------------------|------------------------|
| Group1/<br>10 <sup>-6</sup> mm <sup>3</sup>  | 5.55                  | 4.32                  | 2.75                   | 3.64                  | 1.93                  | 1.96                   |
| Group2/<br>10 <sup>-6</sup> mm <sup>3</sup>  | 5.57                  | 4.21                  | 2.95                   | 3.71                  | 2.02                  | 2.18                   |
| Group3/<br>10 <sup>-6</sup> mm <sup>3</sup>  | 5.27                  | 4.25                  | 3.06                   | 3.56                  | 1.90                  | 2.06                   |
| Average/<br>10 <sup>-6</sup> mm <sup>3</sup> | 5.46                  | 4.26                  | 2.92                   | 3.64                  | 1.95                  | 2.07                   |

## References

- S1. Y. F. Fang, J. He, P. Huang, Experimental and Numerical Analysis of Soft Elastohydrodynamic Lubrication in Line Contact, *Tribol. Lett.*, 2017, 65(2), DOI:10.1007/s11249-017-0825-9.
- S2. Q. Q. Yang, P. Huang, Y. F. Fang, A novel Reynolds equation of non-Newtonian fluid for lubrication simulation, *Tribol. Int.*, 2016, 94, 458-463, DOI: 10.1016/j.triboint.2015.10.011.
- S3. B. K. Karthikeyan, M. Teodorescu, H. Rahnejat, S. J. Rothberg, Thermoelastohydrodynamics of grease-lubricated concentrated point contacts, *Proc. Inst. Mech. Eng. Part C: J. Mech. Eng. Sci.*, 2010, 224(C3), 683-695, DOI:10.1243/09544062JMES1748.
- S4. S. Zhang, B. Klinghart, G. Jacobs, S. von Goeldel, F. Koenig, Prediction of bleeding behavior and film thickness evolution in grease lubricated rolling contacts, *Tribol. Int.*, 2024, 193, DOI: 10.1016/j.triboint.2024.109369.
